# Supplementary material
Source: publisher figshare collection journal article supplement (https://acs.figshare.com/ndownloader/files/3777955)

**Supporting Information 1**

**Figure showing the fractures on the surfaces of 50FZS and 100FZS samples that are heat treated to 1300 °C**

(Magnified images showing the decrease in cracks with increase in Iron concentration)

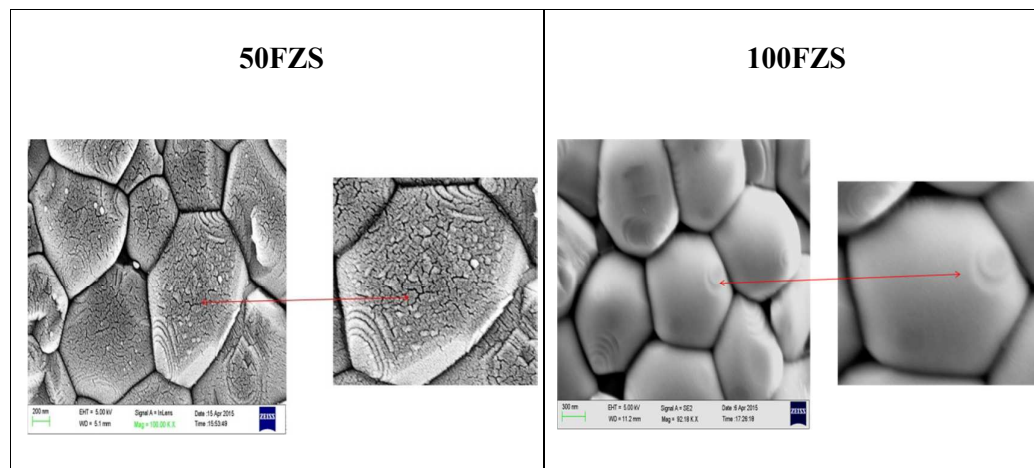

## Supporting Information -2

Point EDX spectrum images obtained for 100FZS at 1300 °C

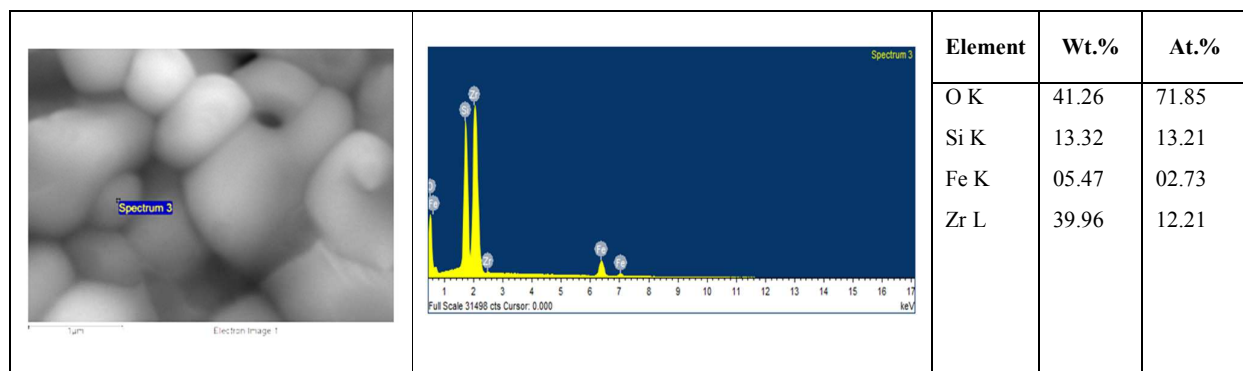

## Supporting Information -3

Elemental mapping images of the 100FZS sample at 1300 °C

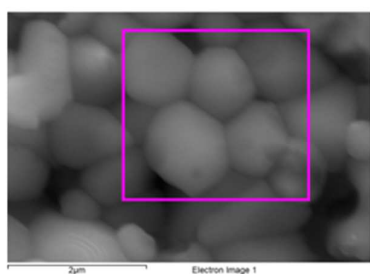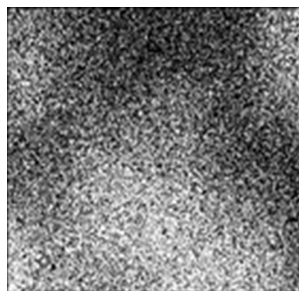

Fe ka1

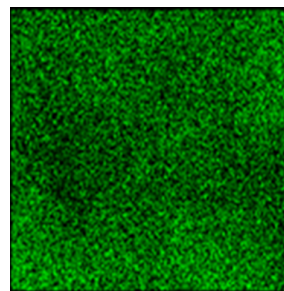

O ka1

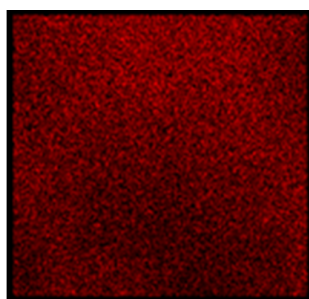

Si ka1

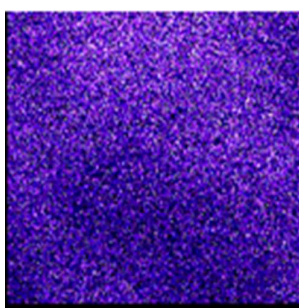

Zr ka1

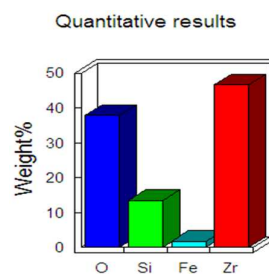

Supplement: Supplementary file 1 [file 3777955]
